# Supplementary material for: Biomimetic adsorption of zwitterionic–xyloglucan block copolymers to CNF: towards tailored super-absorbing cellulose materials
Source: Royal Society of Chemistry journal article supplement (doi:10.1039/c6ra28236a), 2017-01-01
Supplement: c6ra28236a1.pdf [file c6ra28236a1.pdf]

## Electronic Supplementary Information

### **Biomimetic adsorption of zwitterionic-xyloglucan block copolymers to CNF: Towards tailored super-absorbing cellulose materials**

Fiona L. Hatton,<sup>†</sup> Joakim Engström,<sup>†‡</sup> Josefine Forsling,<sup>†</sup> Eva Malmström<sup>†</sup> and Anna Carlmark<sup>†\*</sup>

<sup>†</sup>Department of Fibre and Polymer Technology, <sup>‡</sup>Wallenberg Wood Science Centre, KTH Royal Institute of Technology, School of Chemical Science and Engineering, Teknikringen 56, SE-100 44 Stockholm, Sweden

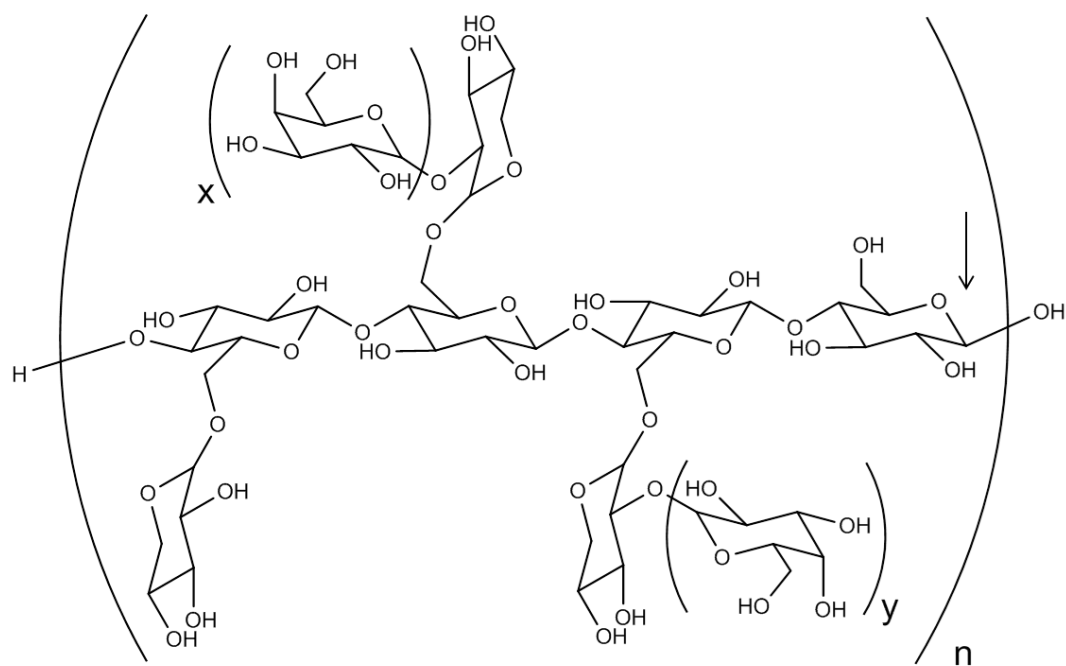

**Figure S1** The structure of XXXG-type xyloglucans. Tamarind seed xyloglucan is comprised of XXXG ( $x = 0$ ,  $y = 0$ ), XLXG ( $x = 1$ ,  $y = 0$ ), XXLXG ( $x = 0$ ,  $y = 1$ ), and XLLG ( $x = 1$ ,  $y = 1$ ). The arrow indicates the reducing chain end.

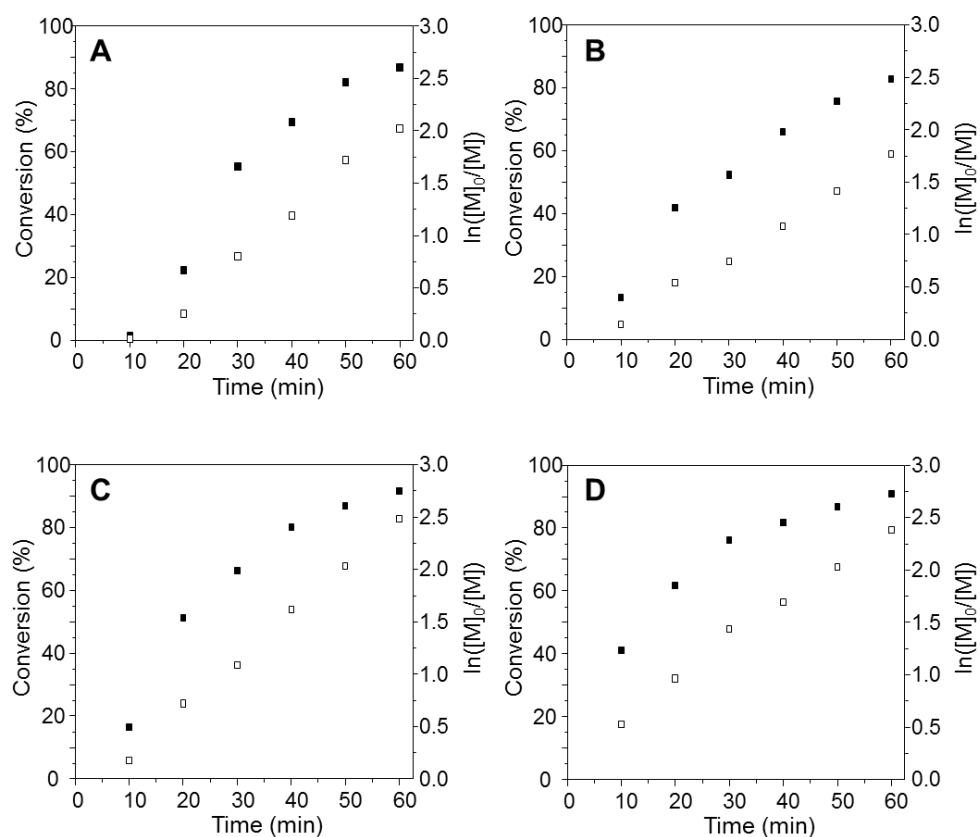

**Figure S2** Kinetic experiments for the polymers in this study; A) PSBMA<sub>266</sub>, B) PSBMA<sub>710</sub>, C) XG-*b*-PSBMA<sub>266</sub> and D) XG-*b*-PSBMA<sub>710</sub>, conversion vs. time (filled squares) and  $\ln([M]_0/[M])$  vs. time (empty squares)

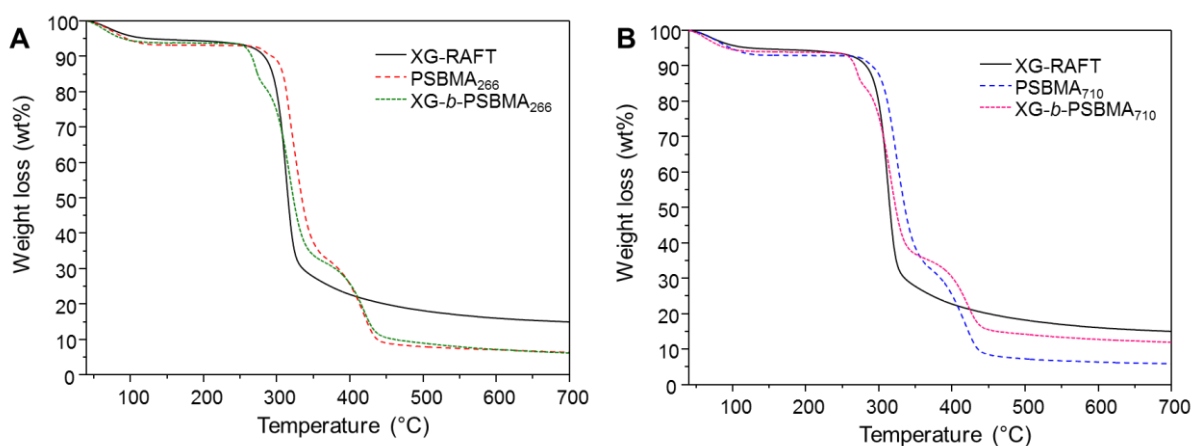

**Figure S3** Thermogravimetric weight loss curves for XG-RAFT, PSBMA<sub>n</sub> and XG-*b*-PSBMA<sub>n</sub> samples, A)  $n = 266$ , B)  $n = 710$ .

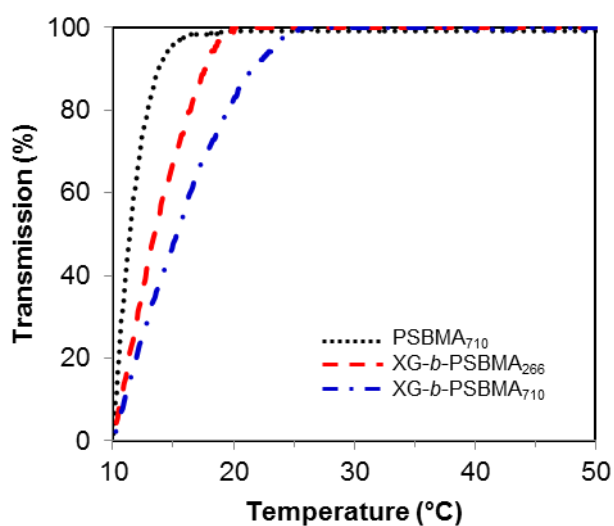

**Figure S4** Turbidity curves for samples; PSBMA<sub>710</sub>, XG-*b*-PSBMA<sub>266</sub> and XG-*b*-PSBMA<sub>710</sub>, for the cooling step ( $1\text{ }^{\circ}\text{C min}^{-1}$ ) at a concentration of  $5\text{ mg mL}^{-1}$  in MilliQ water

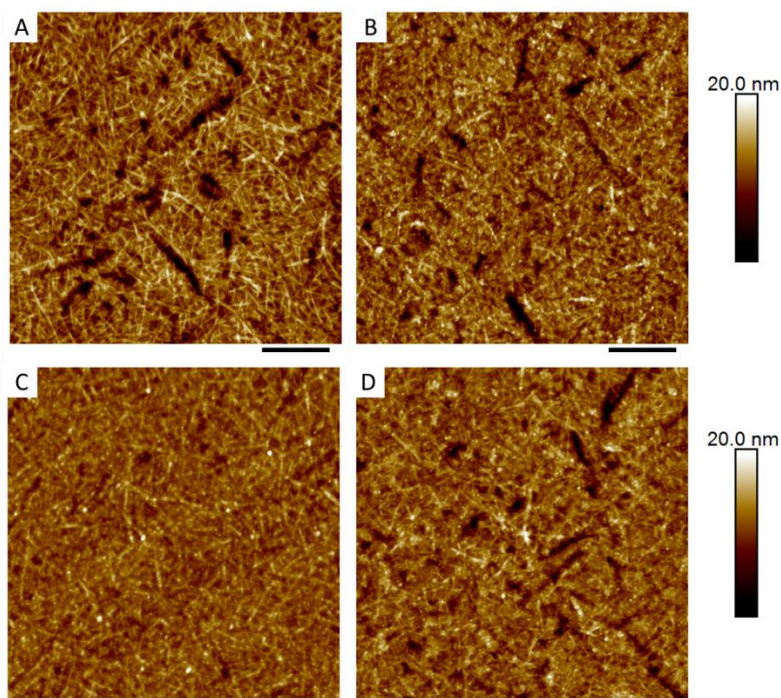

**Figure S5** Atomic force microscopy height images of the QCM-D crystal surfaces after *in situ* adsorption experiments. A) PSBMA<sub>266</sub>, B) XG-*b*-PSBMA<sub>266</sub>, C) PSBMA<sub>710</sub> and D) XG-*b*-PSBMA<sub>710</sub>. Images are 2 μm x 2 μm, scale bars = 400 nm.

**Table S1** Compression test data for CNF composite films after swelling for 120 h in deionized water at 60 °C.

| Sample                                 | Compressive strength (MPa) | Compressive strain (%) |
|----------------------------------------|----------------------------|------------------------|
| CNF Ref                                | $0.386 \pm 0.050$          | $57.5 \pm 10.5$        |
| CNF/XG- <i>b</i> -PSBMA <sub>710</sub> | $0.060 \pm 0.003$          | $38.1 \pm 5.0$         |
| CNF/PSBMA <sub>710</sub>               | $0.093 \pm 0.011$          | $41.6 \pm 3.6$         |

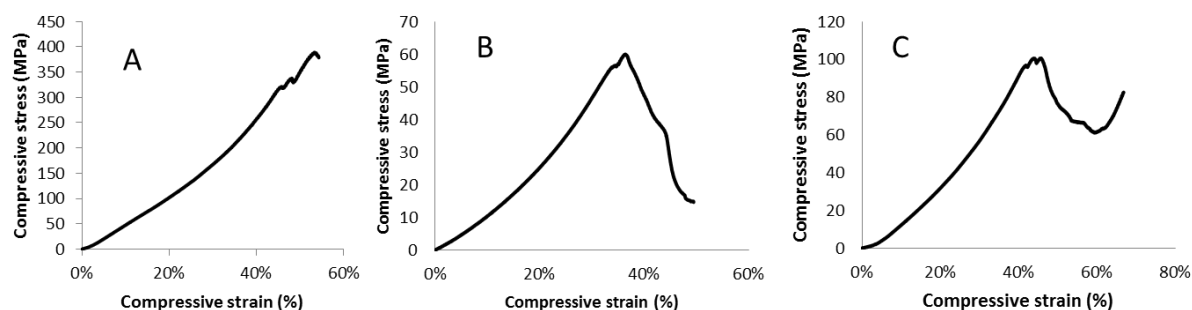

**Figure S6** Compression tests of CNF composite films swollen for 120 h at 60 °C and compressed in swollen state, CNF Reference (A), CNF/XG-*b*-PSBMA<sub>710</sub> (B) and CNF/PSBMA<sub>710</sub> (C). Compression testing performed with strain rate 10%/min.
